# Supplementary material for: Genome-wide association study provides strong evidence of genes affecting the reproductive performance of Nellore beef cows
Source: PLoS One. 2017 May 31;12(5):e0178551. doi: 10.1371/journal.pone.0178551 (PMC5451131; doi:10.1371/journal.pone.0178551)
Supplement: S1 Table — (DOCX) [file pone.0178551.s001.docx]

**Genome-wide association study provides strong evidence of genes affecting the reproductive performance of Nellore beef cows.** Thaise Pinto de Melo, Gregório Miguel Ferreira de Camargo, Lucia Galvão de Albuquerque, Roberto Carvalheiro*. *Corresponding author: Department of Animal Science, School of Agricultural and Veterinarian Sciences, FCAV/ UNESP – Sao Paulo State University, Jaboticabal, Sao Paulo, Brazil; e-mail: rcar@fcav.unesp.br

**S1 Table. Genes harbored in the top20 windows for heifer rebreeding.**

| **BTA** | **Position (Mb)** | **%var** | **Genes** | **GenBank Accession no** |
| --- | --- | --- | --- | --- |
| 4 | 6-7 | 0.34 | VWC2, LOC101904266, LOC781773 | AC_000161 GPC_000000173 |
| 6 | 78-79 | 0.38 | TRNAC-GCA, ADGRL3 | AC_000163 GPC_000000175 |
| 6 | 110-111 | 0.36 | SLC2A9, TRNAG-CCC, WDR1, ZNF518B, LOC100335675, CLNK, LOC101905921, TRNAA-UGC | AC_000163 GPC_000000175 |
| 10 | 88-89 | 0.35 | TTLL5, TGFB3, IFT43, GPATCH2L, ESRRB, LOC104973251, LOC101903493, LOC104973252 | AC_000167 GPC_000000179 |
| 11 | 70-71 | 0.38 | LOC104968430, LOC101905929, ALK, CLIP4, C11H2orf71, FAM179A, TRNAS-GGA, LOC104973418, WDR43, TRMT61B, SPDYA, PPP1CB | AC_000168 GPC_000000180 |
| 11 | 71-72 | 0.67 | PLB1, LOC104973420, LOC104973419, LOC104973421, FOSL2a, LOC104973422, BREa, LOC101904887, LOC101904806, RBKSa, MRPL33, SLC4A1AP, LOC101905151 | AC_000168 GPC_000000180 |
| **11** | **72-73b** | 0.92 | SLC4A1AP, SUPT7L, GPN1, CCDC121, ZNF512, LOC100141098, GCKR, FNDC4, IFT172a, KRTCAP3, NRBP1, PPM1Ga, ZNF513, SNX17a, EIF2B4, GTF3C2, MPV17, UCNa, TRIM54, DNAJC5G, SLC30A3a, CADa, ATRAID, SLC5A6, TCF23a, PRR30, PREBa, ABHD1, CGREF1, KHK, EMILIN1a, OST4, AGBL5, TRNAA-AGC, TRNAY-GUA, TMEM214, LOC101906001, MAPRE3, DPYSL5, CENPA, SLC35F6, KCNK3, CIB4a, TRNAE-UUC, C11H2orf70, OTOF | AC_000168 GPC_000000180 |
| 11 | 73-74 | 0.40 | OTOF, DRC1, EPT1, MIR2284Y-1, GPR113, LOC101906131, HADHB, HADHA, GAREML, LOC104973423, RAB10, LOC104973424, TRNAC-ACA, KIF3C, LOC104973425, LOC783461, ASXL2, DTNB, TRNAC-GCA, LOC100847382, LOC104973427, DNMT3A, MIR1301, LOC104968513 | AC_000168 GPC_000000180 |
| 13 | 1-2 | 0.35 | PLCB1, MIR2285M-1, LOC104973687, LOC104973688 | AC_000170 GPC_000000182 |
| 14 | 39-40 | 0.48 | STAU2, LOC104974049, MIR2284L, UBE2W, TCEB1, TMEM70, LY96, LOC104974050, LOC101904383, TRNAE-UUC, LOC104974052, LOC104974051, LOC100337130, LOC781682, JPH1, LOC104974056, LOC104974055, LOC104974054, GDAP1, LOC104974053 | AC_000171 GPC_000000183 |
| 15 | 51-52 | 0.40 | LOC104974262, OR51E1, OR51D1, TRIM68, OR52I2, LOC618050, LOC510351, LOC784727, LOC784689, OR52K2, LOC617417, OR52K1, OR52M1, LOC618067, LOC521676, LOC618075, TRIM21, LOC518464, LOC785574, LOC100138885, OR52B4, LOC517056, LOC785740, LOC785109, LOC519105, LOC618213, LOC785773, LOC506452, LOC785853, LOC100299115, LOC100298880, LOC782157, LOC784088, LOC619140, LOC785808, LOC788363, LOC519104, LOC100299247, TRNAG-CCC, LOC525033, LOC618173, RRM1, LOC101904526, STIM1 | AC_000172 GPC_000000184 |
| **16** | **50-51b** | 0.44 | C16H1orf174, DFFB, CEP104, MIR2320, LOC101906943, LOC104974456, LRRC47, SMIM1, CCDC27, TP73, WRAP73, TPRG1L, MEGF6, MIR551A, ARHGEF16 | AC_000173 GPC_000000185 |
| 17 | 49-50 | 1.04 | TMEM132D, LOC101907645, GLT1D1, LOC100140533, TRNAE-UUC, SLC15A4, TMEM132C, LOC101907809, LOC104974623 | AC_000174 GPC_000000186 |
| 17 | 65-66 | 0.38 | TRIAP1, GATC, SRSF9, DYNLL1, COQ5, RNF10, POP5, CABP1, MLEC, UNC119B, ACADS, LOC104974683, SPPL3, LOC104974672, HNF1A, LOC104974673, C17H12orf43, OASL, LOC101905682, LOC100296211, ANKRD13A, GIT2, TCHP, GLTP, TRPV4, FAM222A, LOC101903333, LOC104974674, LOC104974675, MVK, MMAB, UBE3B, KCTD10, MYO1H | AC_000174 GPC_000000186 |
| **17** | **70-71c** | 0.34 | TTC28, LOC101902902, TRNAE-CUC, CHEK2a, HSCB, LOC104974694, CCDC117, XBP1a, TRNAG-CCC, LOC101903066, LOC104970055, ZNRF3, LOC615587, KREMEN1, LOC104974695, EMID1, RHBDD3, EWSR1, GAS2L1, RASL10A, AP1B1, LOC100847257, NEFH, THOC5, NIPSNAP1 | AC_000174 GPC_000000186 |
| 20 | 3-4 | 0.43 | LOC533085, TLX3, TRNAK-UUU, NPM1, FGF18, LOC781186, LOC104975182, LOC104975183, SMIM23, LOC533234, FBXW11, LOC101902681, LOC101903110, STK10, LOC101903680, LOC101903388, LOC100138705, EFCAB9, UBTD2 | AC_000177 GPC_000000189 |
| 20 | 14-15 | 0.53 | ADAMTS6, LOC104975223, LOC104975224, CWC27, LOC784354, LOC104975225, SREK1IP1, FAM159B, RGS7BP | AC_000177 GPC_000000189 |
| 21 | 42-43 | 0.38 | STRN3, AP4S1, HECTD1, LOC101908185, HEATR5A, DTD2, GPR33, NUBPL, ARHGAP5 | AC_000178 GPC_000000190 |
| 26 | 42-43 | 0.33 | ATE1, LOC101907255, LOC104970731, NSMCE4A, TACC2, MIR2396, BTBD16, LOC104970753, LOC104970752, PLEKHA1, HTRA1, LOC100849037, DMBT1, LOC100295703, SPADH2, SPADH1, C26H10orf120, LOC100300910, LOC104968509, LOC617705, LOC104970756, TRNAG-CCC | AC_000183 GPC_000000195 |
| 29 | 13-14 | 1.14 | FAM181Ba, LOC783542, TRNAC-GCA, LOC101903586, TRNAC-GCA, LOC104971240 | AC_000186 GPC_000000198 |

%var, Additive genetic variance proportion explained by the window.

aGenes associated with reproductive events.

bWindows in bold were in common between the traits heifer rebreeding and number of calvings at 53 months of age.
